# Supplementary material
Source: ML conference proceedings conference paper supplement (https://proceedings.neurips.cc/paper_files/paper/2020/hash/045117b0e0a11a242b9765e79cbf113f-Abstract.html)
Supplement: Supplementary file [file 045117b0e0a11a242b9765e79cbf113f-Supplemental.pdf]

## Supplementary material to:

# On the Value of Out-of-Distribution Testing: An Example of Goodhart’s Law

## A Implementation details

### A.1 Implementation of the proposed methods

The **random predictions, inverted** model discard the answers observed in the training set below a fixed threshold, so as to avoid the inverse operation to assign extremely large probabilities to them. The answers retained after thresholding are: yes, no, 1, 2, 3, and 1,100 *other* answers. The **random-image regularizer** is applied on a BUTD model pretrained with the standard BCE loss for 25 epochs. Our methods based on the BUTD model use standard implementation and hyperparameters [40]. The BUTD model is optimized for maximum likelihood over the training set  $\mathcal{T}$  with a standard binary cross-entropy (BCE) loss and a logistic function over the the logits  $\mathbf{a}^{\text{pred}} = f(\mathbf{q}, \mathbf{v})$ :

$$\mathcal{L}_{\text{BCE}}(\mathbf{a}^{\text{pred}}, \mathbf{a}^{\text{gt}}) = -\mathbf{a}^{\text{gt}} \log(\sigma(\mathbf{a}^{\text{pred}})) - (1 - \mathbf{a}^{\text{gt}}) \log(1 - \sigma(\mathbf{a}^{\text{pred}})). \quad (3)$$

### A.2 Experimental setup

Our experiments follow the (flawed) common practice of training each model on VQA-CP (the v2 version) then on VQA v2. We report performance at the epoch of highest accuracy on VQA-CP test or VQA v2 validation respectively. In addition, when training on VQA-CP, we hold out 8,000 instances from the training set that measure in-domain performance following [41, 14]. For existing methods, we report the results of highest overall accuracy on VQA-CP test reported by their respective authors.

## B Additional results

See next page.

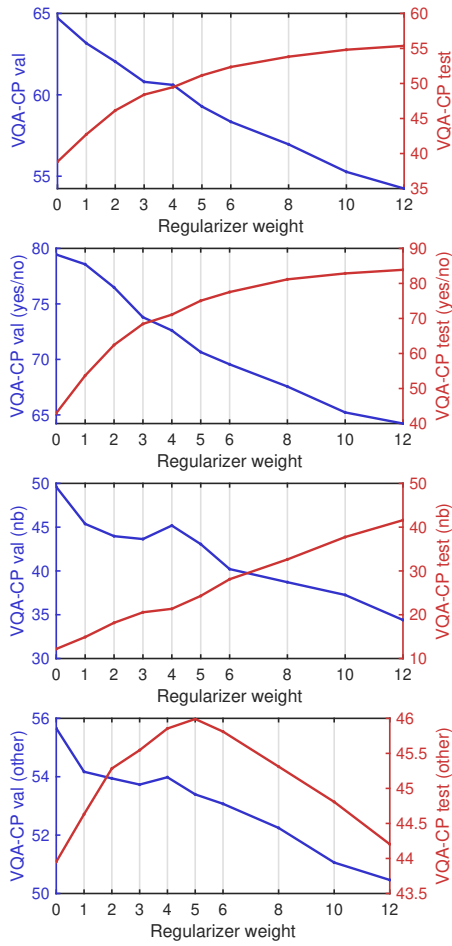

(a) Model trained on VQA-CP.

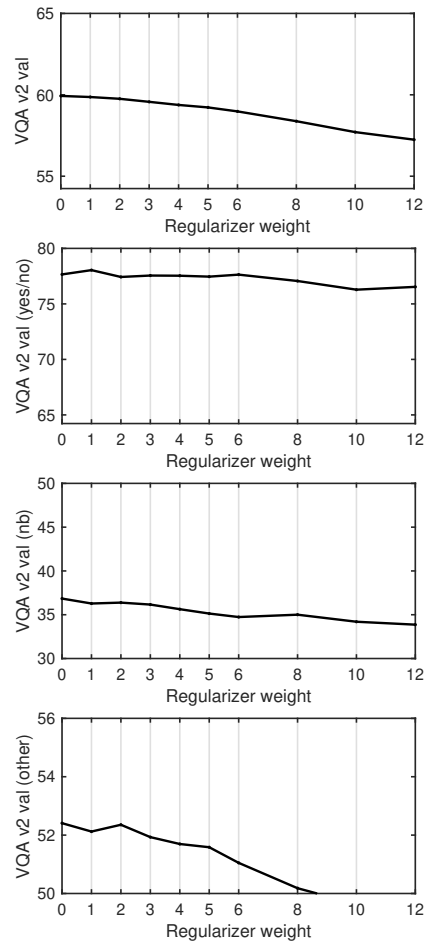

(b) Model trained on VQA v2.

Figure 5: Performance of the random-image regularizer as a function of the regularizer weight ( $\lambda$ ) for (top to bottom): all questions, questions with *yes/no* answers, *number* answers, and *other* answers.

Table 3: Accuracy of methods trained and evaluated on VQA-CP ‘Other’ questions alone. Existing methods were implemented on top of different baseline models, so we report the accuracy of both the baseline and the proposed versions.

| Training set →                                             | VQA-CP Training ‘Other’ |                      |
|------------------------------------------------------------|-------------------------|----------------------|
|                                                            | VQA-CP Val. ‘Other’     | VQA-CP Test ‘Other’  |
| Test set →                                                 |                         |                      |
| Actively seeking [41]: baseline                            | 45.46                   | 31.09                |
| Actively seeking [41]: as proposed                         | 46.79 (+2.33)           | 34.25 (+3.16)        |
| Gradient supervision [13]: baseline                        | 54.74                   | 43.33                |
| Gradient supervision [13]: as proposed                     | <b>56.10</b> (+1.36)    | 44.70 (+1.40)        |
| Unshuffling [14]: baseline                                 | 54.74                   | 43.33                |
| Unshuffling [14]: as proposed                              | 53.98 (-0.76)           | <b>48.06</b> (+4.73) |
| Random predictions                                         | 10.39                   | 2.63                 |
| Random predictions, inverted                               | 0.03                    | 0.06                 |
| Learned baseline (BUTD)                                    | <b>59.14</b>            | 45.96                |
| Learned, top answer masked                                 | 22.68                   | 22.87                |
| Learned with random-image regularizer, $\lambda=0$ (=BUTD) | <b>59.14</b>            | 45.96                |
| Learned with random-image regularizer, $\lambda=1$         | 58.19                   | 46.60                |
| Learned with random-image regularizer, $\lambda=2$         | 57.52                   | 47.85                |
| Learned with random-image regularizer, $\lambda=3$         | 57.60                   | 47.79                |
| Learned with random-image regularizer, $\lambda=4$         | 56.89 (-2.25)           | <b>47.95</b> (+1.99) |
| Learned with random-image regularizer, $\lambda=5$         | 56.81                   | 47.77                |
| Learned with random-image regularizer, $\lambda=6$         | 56.27                   | 47.52                |
| Learned with random-image regularizer, $\lambda=8$         | 54.93                   | 47.01                |
| Learned with random-image regularizer, $\lambda=10$        | 54.07                   | 46.72                |
| Learned with random-image regularizer, $\lambda=12$        | 53.27                   | 46.20                |

## C Distribution of answers per question type in VQA v2 and VQA-CP

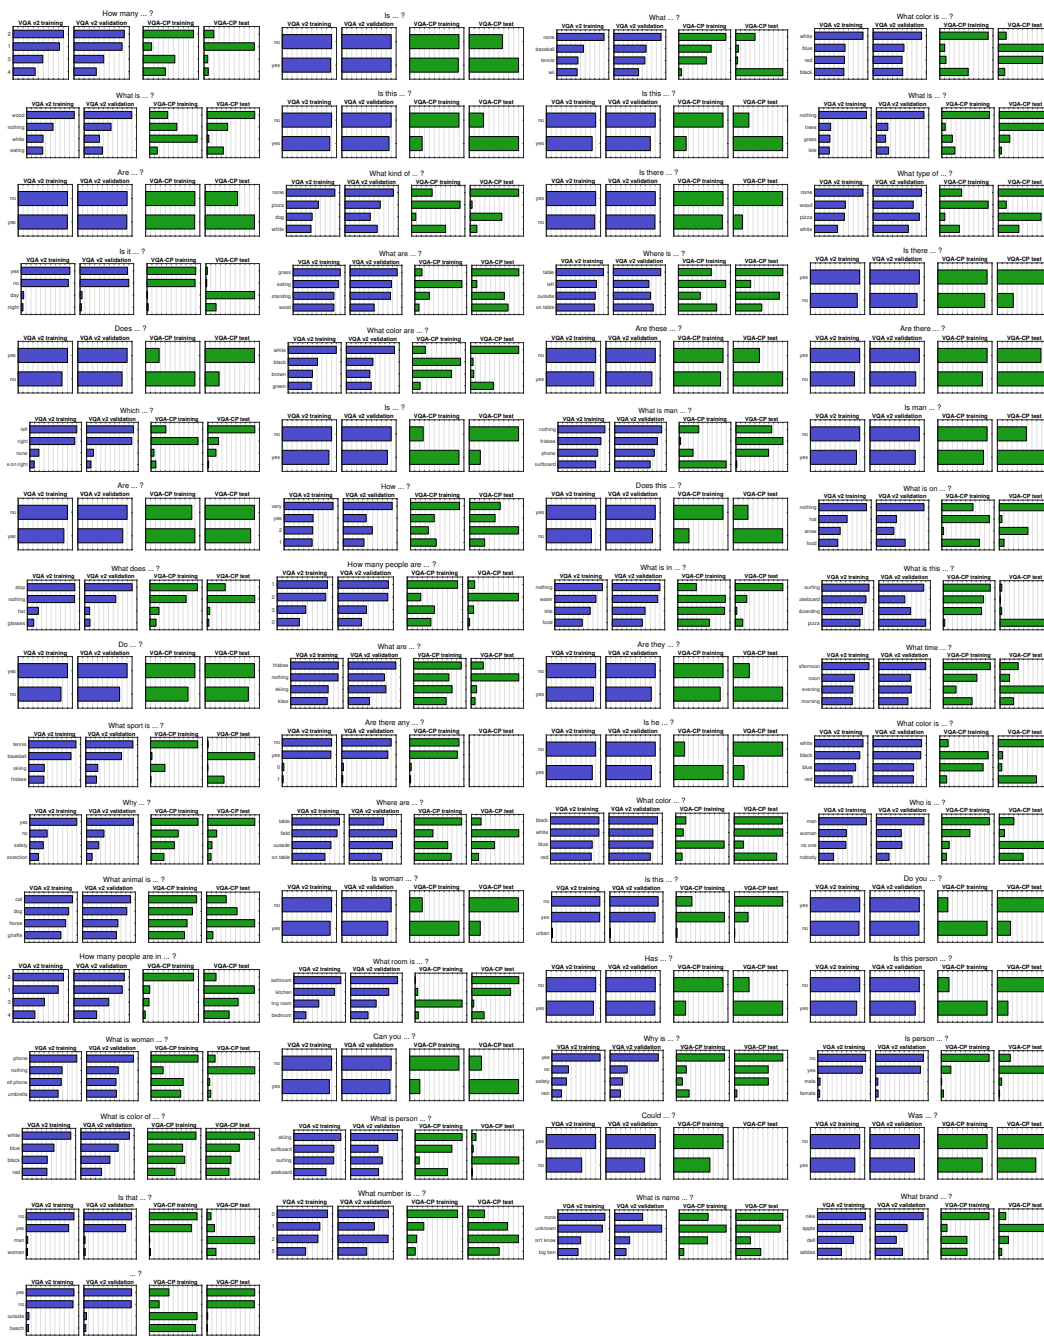

Figure 6: Histograms of the ten most frequent answers for every question prefix in **VQA v2** and **VQA-CP**. The last prefix is empty and is the “catch all” default. Stop words are omitted in the figure, making some prefixes appear identical, e.g. *What is* and *What is the*. Best viewed electronically with magnification.
